# Supplementary material for: Understanding transport mechanisms in ionic liquid/carbonate solvent electrolyte blends
Source: Royal Society of Chemistry journal article supplement (doi:10.1039/c8cp01485j), 2018-01-01
Supplement: c8cp01485j1.pdf [file c8cp01485j1.pdf]

## Understanding Transport Mechanisms in Ionic Liquid/Carbonate Solvent Electrolyte Blends

K. Oldiges,<sup>a,b</sup> D. Diddens,<sup>a</sup> M. Ebrahimi,<sup>c</sup> J. B. Hooper,<sup>c</sup> I. Cekic-Laskovic,<sup>a,b,d</sup> A. Heuer,<sup>a,b</sup> D. Bedrov,<sup>\*c</sup> M. Winter,<sup>a,b,d</sup> and G. Brunklaus<sup>\*a,b,d</sup>

[d.bedrov@utah.edu](mailto:d.bedrov@utah.edu) , [g.brunklaus@fz-juelich.de](mailto:g.brunklaus@fz-juelich.de)

*a. Helmholtz Institute Münster, IEK-12, Forschungszentrum Jülich GmbH, Corrensstrasse 46, 48149 Münster, Germany*

*b. Institute of Physical Chemistry, University of Münster, Corrensstrasse 28/30, 48149 Münster, Germany*

*c. Department of Materials Science & Engineering, University of Utah, 122 South Central Campus Drive, Salt Lake City, Utah 84112, USA*

*d. MEET Battery Research Center, Corrensstrasse 46, 48149 Münster, Germany*

### SUPPLEMENTARY INFORMATION

**Figure S1:** Raman spectra of investigated Pyr<sub>14</sub>TFSI/EC/DMC blends with 1 M LiTFSI as conducting salt in the range from 865 to 950 cm<sup>-1</sup> **S3**

**Figure S2:** Raman spectra of investigated Pyr<sub>14</sub>TFSI/EC/DMC blends with 1 M LiTFSI as conducting salt in the range from 710 to 765 cm<sup>-1</sup> **S3**

**Figure S3:** Raman spectra of investigated Pyr<sub>14</sub>TFSI/EC/DMC blends with 1 M LiPF<sub>6</sub> as conducting salt in the range from 865 to 950 cm<sup>-1</sup> **S4**

**Figure S4:** Raman spectra of investigated Pyr<sub>14</sub>TFSI/EC/DMC blends with 1 M LiPF<sub>6</sub> as conducting salt in the range from 710 to 765 cm<sup>-1</sup> **S4**

**Figure S5:** Radial distribution functions (RDFs) between Li<sup>+</sup> ions and the nitrogen atoms of TFSI for different fractions of Pyr<sub>14</sub>TFSI **S5**

**Figure S6:** Self-diffusion coefficients of all cationic species present in blends of Pyr<sub>14</sub>TFSI, EC and DMC with 1 M LiTFSI and 1 M LiPF<sub>6</sub> as conducting salts at 25°C **S6**

**Figure S7:** Self-diffusion coefficients of all anionic species present in blends of Pyr<sub>14</sub>TFSI, EC and DMC with 1 M LiTFSI and 1 M LiPF<sub>6</sub> as conducting salts at 25°C **S6**

**Figure S8:** Self-diffusion coefficients of all neutral species present in blends of Pyr<sub>14</sub>TFSI, EC and DMC with 1 M LiTFSI and 1 M LiPF<sub>6</sub> as conducting salts at 25°C **S7**

**Figure S9:** Arrhenius plot of ionic conductivities of Pyr<sub>14</sub>TFSI/EC/DMC blends with 1 M LiPF<sub>6</sub> as conducting salt measured from -10 to 40 °C using impedance **S8**

**Figure S10:** Arrhenius plot of ionic conductivities of Pyr<sub>14</sub>TFSI/EC/DMC blends with 1 M LiTFSI as conducting salt measured from -10 to 40 °C using impedance **S8**

**Figure S11:** Arrhenius plot of viscosities of Pyr<sub>14</sub>TFSI/EC/DMC blends (0, 30 and 70% Pyr<sub>14</sub>TFSI) with 1 M LiTFSI and 1 M LiPF<sub>6</sub> as conducting salts measured from -10 to 40 °C **S9**

S1

**Figure S12:** Arrhenius plot of viscosities of Pyr<sub>14</sub>TFSI/EC/DMC blends with 1 M LiPF<sub>6</sub> as conducting salt measured from -10 to 40 °C **S10**

**Figure S13:** Arrhenius plot of viscosities of Pyr<sub>14</sub>TFSI/EC/DMC blends with 1 M LiTFSI as conducting salt measured from -10 to 40 °C **S10**

**Figure S14:** Dissociation degree of the conducting salts LiTFSI and LiPF<sub>6</sub> in blends of Pyr<sub>14</sub>TFSI, EC and DMC at 25 °C **S11**

**Figure S15:** Weight loss in % of the investigated Pyr<sub>14</sub>TFSI/ EC/ DMC samples with increasing temperature (30 - 575 °C) resulting from TGA measurements **S12**

**Figure S16:** Heat flows in mW in the temperature range from 150 to 230 K for blends of 1 M LiPF<sub>6</sub> in Pyr<sub>14</sub>TFSI/EC/DMC resulting from DSC measurements **S13**

**Figure S17:** Heat flows in mW in the temperature range from 150 to 230 K for blends of 1 M LiTFSI in Pyr<sub>14</sub>TFSI/EC/DMC resulting from DSC measurements **S13**

**Table ST1.** VTF activation energies derived from fitting viscosity and impedance data and glass transition temperatures of Pyr<sub>14</sub>TFSI/EC/DMC blends with 1 M LiPF<sub>6</sub> and 1 M LiTFSI as conducting salts **S14**

**Figure S18:** Linear sweep voltammetry profiles of the investigated Pyr<sub>14</sub>TFSI/EC/DMC blends with 1 M LiPF<sub>6</sub> and 1 M LiTFSI as conducting salts at room temperature with a scan rate of 0.1 mV/s **S15**

## Raman spectra

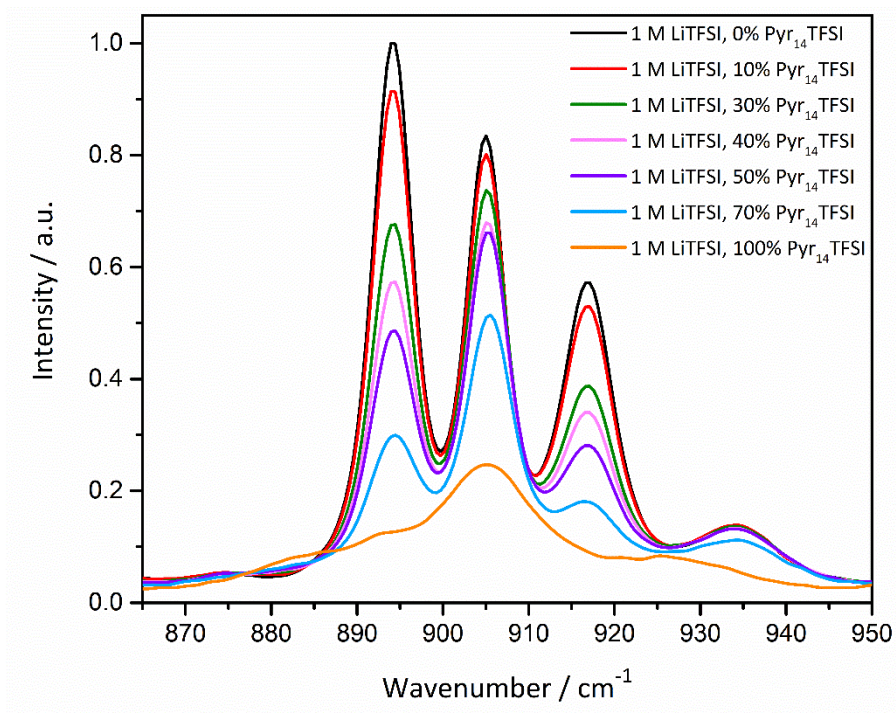

Figure S1. Raman spectra of investigated Pyr<sub>14</sub>TFSI/EC/DMC blends with 1 M LiTFSI as conducting salt in the range from 865 to 950 cm<sup>-1</sup>.

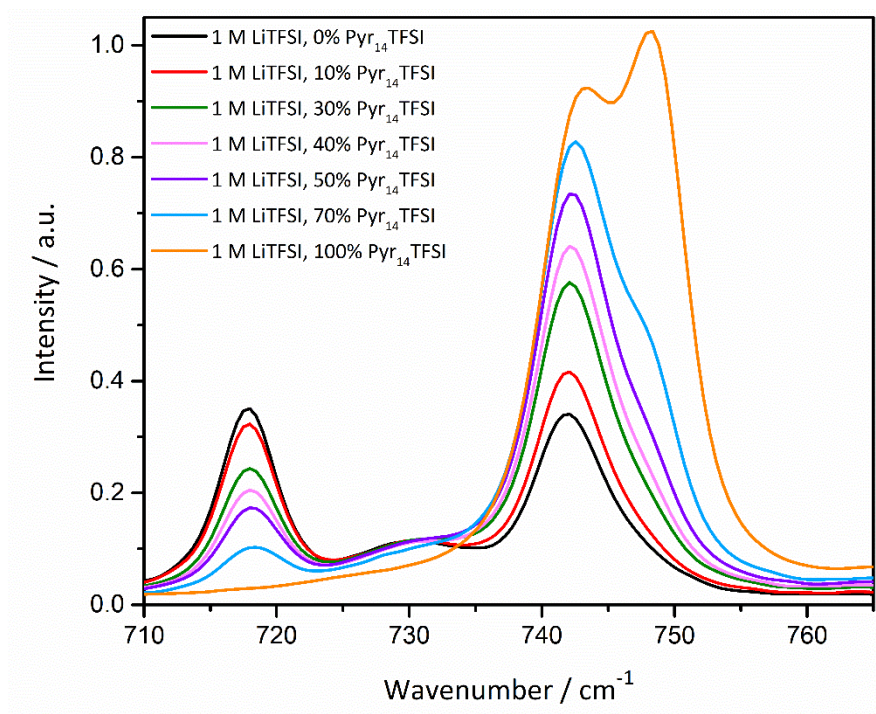

Figure S2. Raman spectra of investigated Pyr<sub>14</sub>TFSI/EC/DMC blends with 1 M LiTFSI as conducting salt in the range from 710 to 765 cm<sup>-1</sup>.

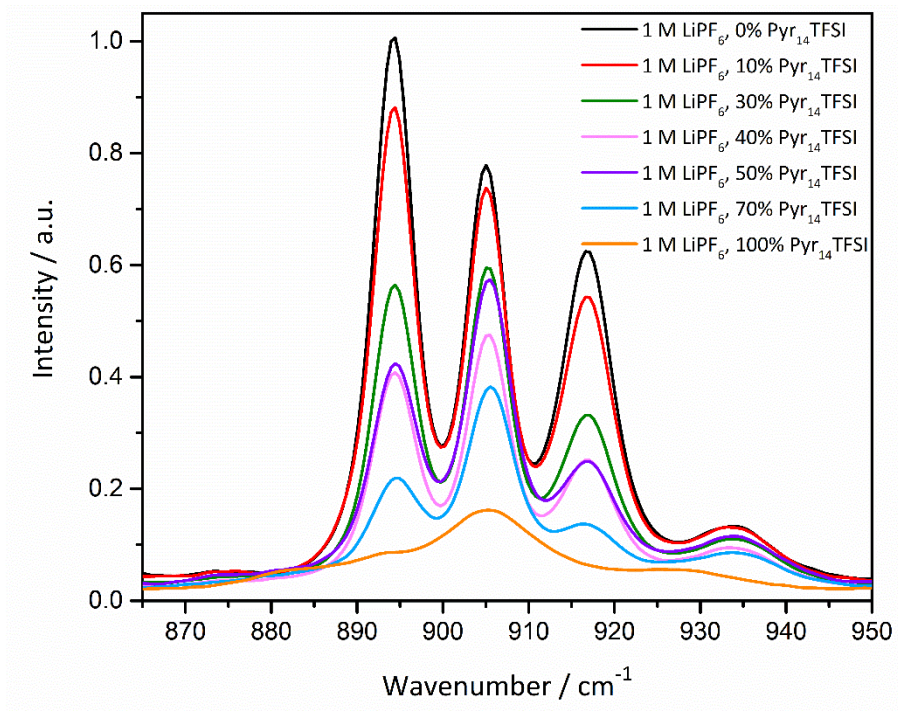

Figure S3. Raman spectra of investigated Pyr<sub>14</sub>TFSI/EC/DMC blends with 1 M LiPF<sub>6</sub> as conducting salt in the range from 865 to 950 cm<sup>-1</sup>.

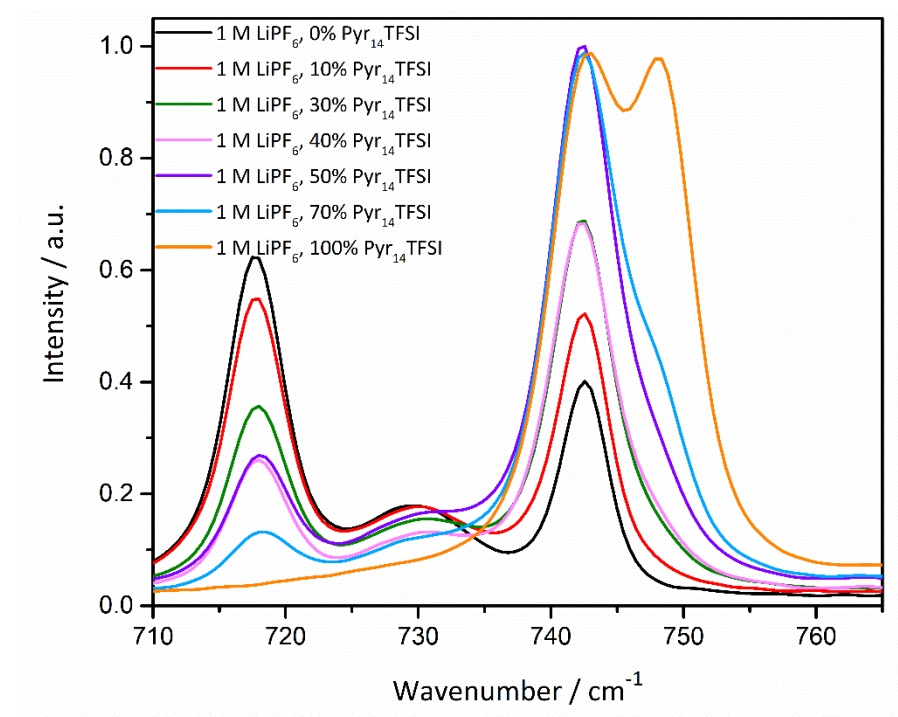

Figure S4. Raman spectra of investigated Pyr<sub>14</sub>TFSI/EC/DMC blends with 1 M LiPF<sub>6</sub> as conducting salt in the range from 710 to 765 cm<sup>-1</sup>.

## Radial Distribution Function

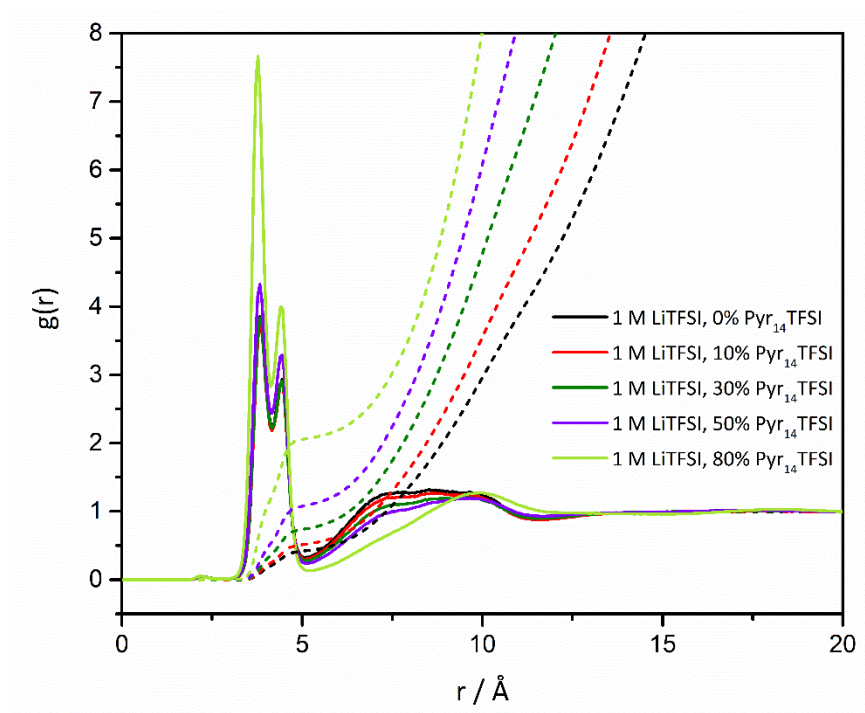

Figure S5. Radial distribution functions (RDFs) between Li<sup>+</sup> ions and the nitrogen atoms of TFSI for different fractions of Pyr<sub>14</sub>TFSI. The dashed lines correspond to the integrated curves, from which the coordination numbers have been extracted at 4.16  $\text{\AA}$  for the population of bidentate coordinations and at 5.0  $\text{\AA}$  for the sum of mono- and bidentate coordinations.

## Self-diffusion coefficients

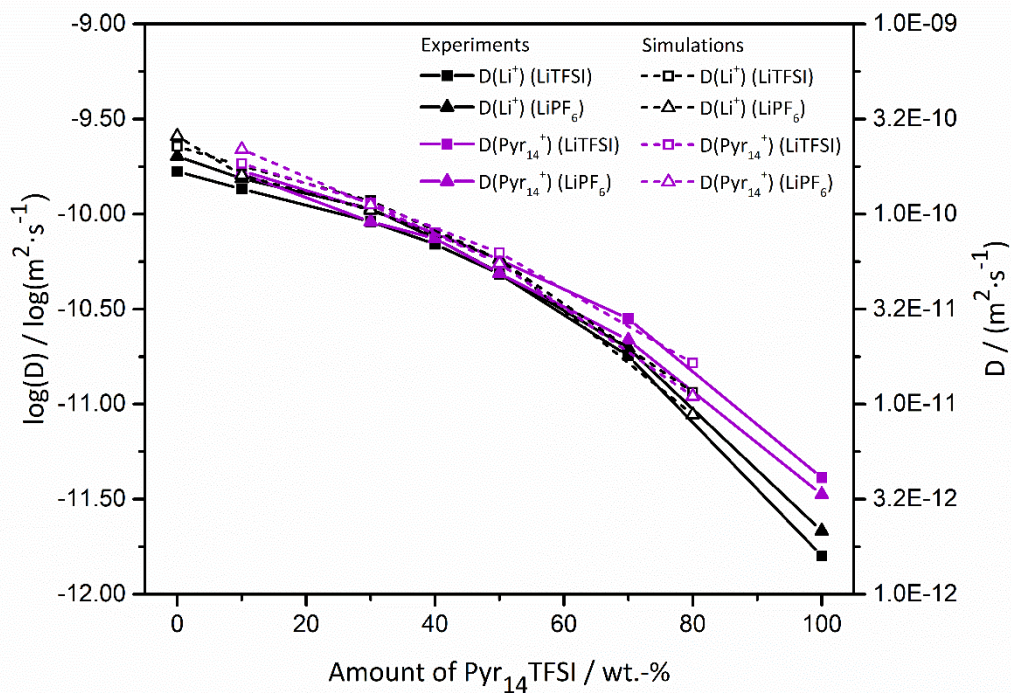

Figure S6. Self-diffusion coefficients of all cationic species present in blends of Pyr<sub>14</sub>TFSI, EC and DMC with 1 M LiTFSI and 1 M LiPF<sub>6</sub> as conducting salts at 25°C. ■▲ Experimental data points. □△ Simulation data points. The solid and dashed lines are guides to the eye.

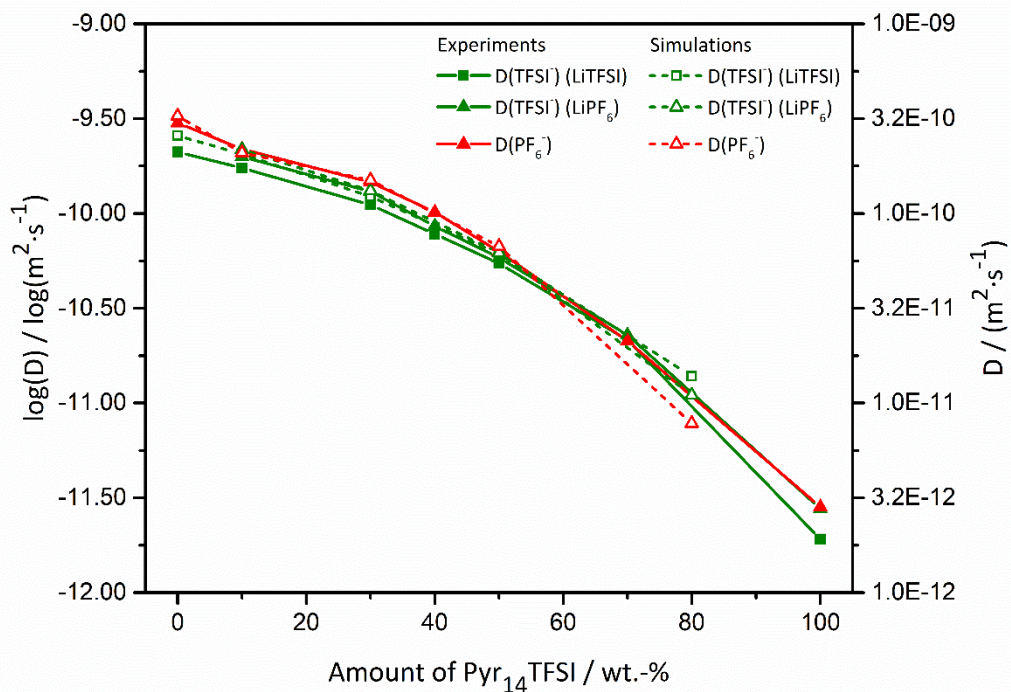

Figure S7. Self-diffusion coefficients of all anionic species present in blends of Pyr<sub>14</sub>TFSI, EC and DMC with 1 M LiTFSI and 1 M LiPF<sub>6</sub> as conducting salts at 25°C. ■▲ Experimental data points. □△ Simulation data points. The solid and dashed lines are guides to the eye.

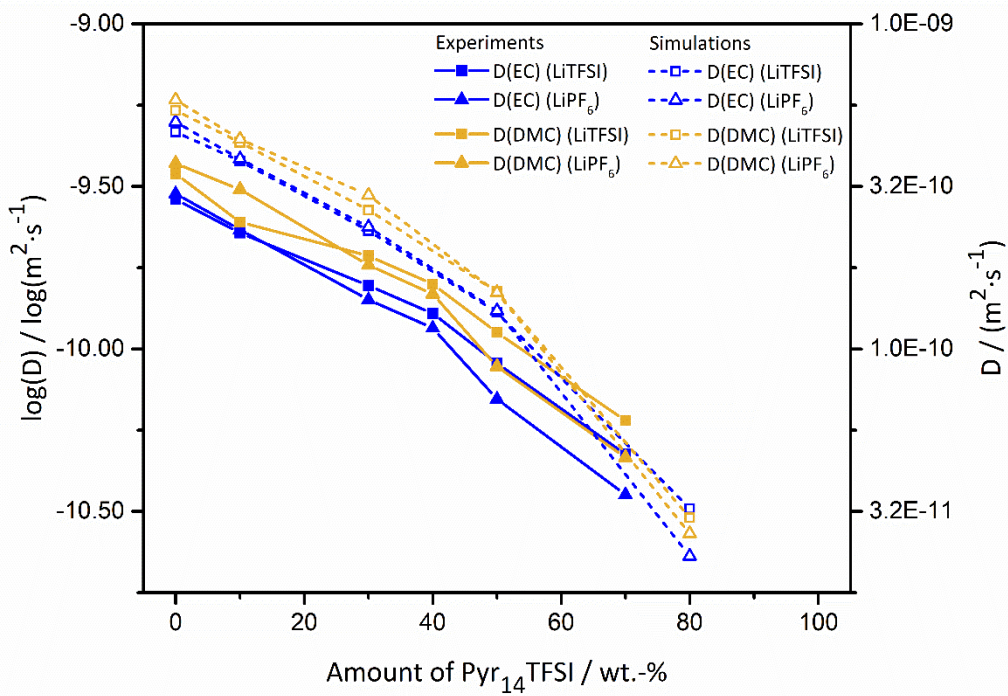

Figure S8. Self-diffusion coefficients of all neutral species present in blends of Pyr<sub>14</sub>TFSI, EC and DMC with 1 M LiTFSI and 1 M LiPF<sub>6</sub> as conducting salts at 25°C. ■▲ Experimental data points. □△ Simulation data points. The solid and dashed lines are guides to the eye.

## Impedance measurements

### Cell design and calibration

The cells comprise coaxial impedance electrodes of stainless steel with an outer diameter of 6 mm. The outer ring electrode and the PEEK isolator have thicknesses of 1 mm and 1.5 mm, respectively. The electrode in the middle has a diameter of 1 mm. The cell was calibrated with a 0.01 M KCl solution as conductance standard according to ISO 7888 (Sigma-Aldrich).

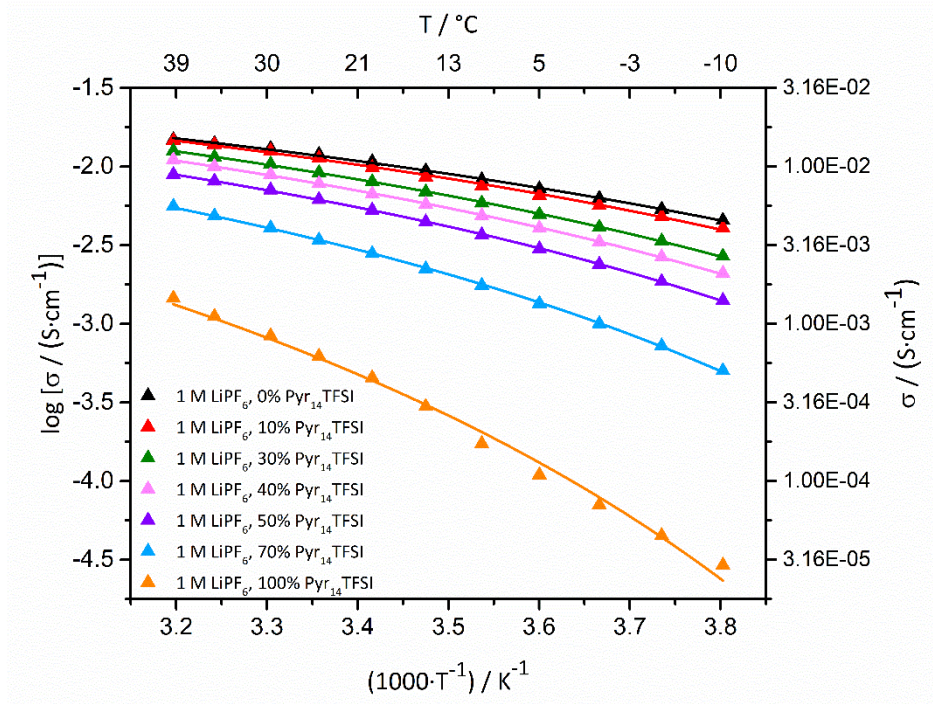

Figure S9. Arrhenius plot of ionic conductivities of Pyr<sub>14</sub>TFSI/EC/DMC blends with 1 M LiPF<sub>6</sub> as conducting salt measured from -10 to 40 °C using impedance. The data points are fitted using VTF function.

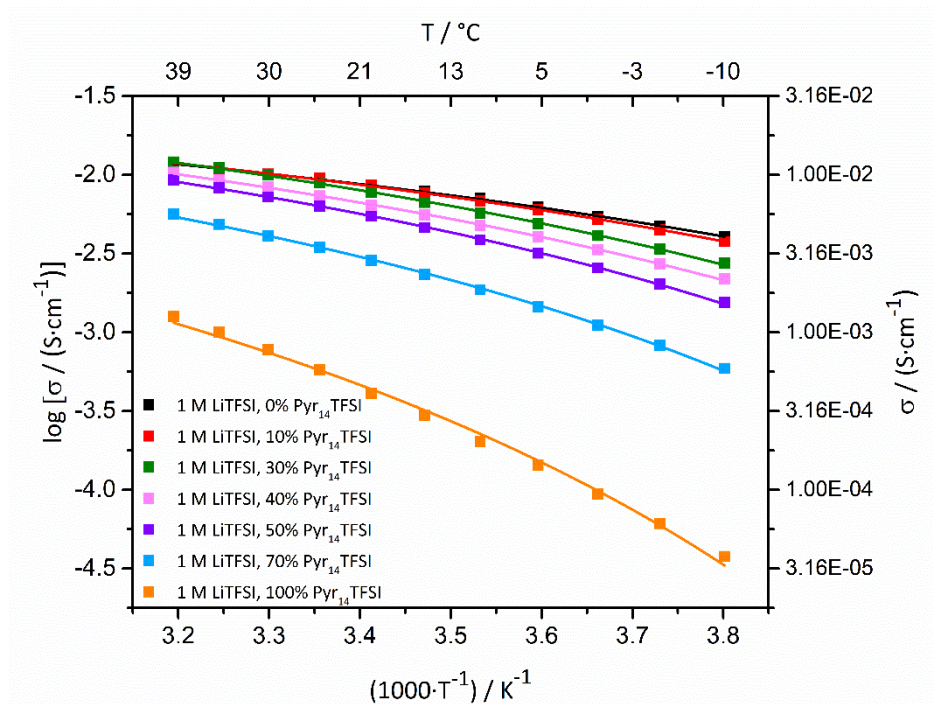

Figure S10. Arrhenius plot of ionic conductivities of Pyr<sub>14</sub>TFSI/EC/DMC blends with 1 M LiTFSI as conducting salt measured from -10 to 40 °C using impedance. The data points are fitted using VTF function.



## Viscosities

### Experimental

Viscosity measurements were performed with an Anton Paar MCR 301 rheometer in a dry room (water content below 30 ppm). The device was equipped with a temperature system CTD 450 and a CP50-0.5/TG measuring system with a diameter of 49.947 mm, a cone angle of 0.473° and a distance of 68  $\mu\text{m}$  between cone and lower plate. The viscosities were measured in a temperature range of -10 °C to 40 °C in steps of 10 °C; viscosities were also measured at 25 °C. The shear rates were increased with increasing temperature from 800  $\text{s}^{-1}$  to 2800  $\text{s}^{-1}$ .

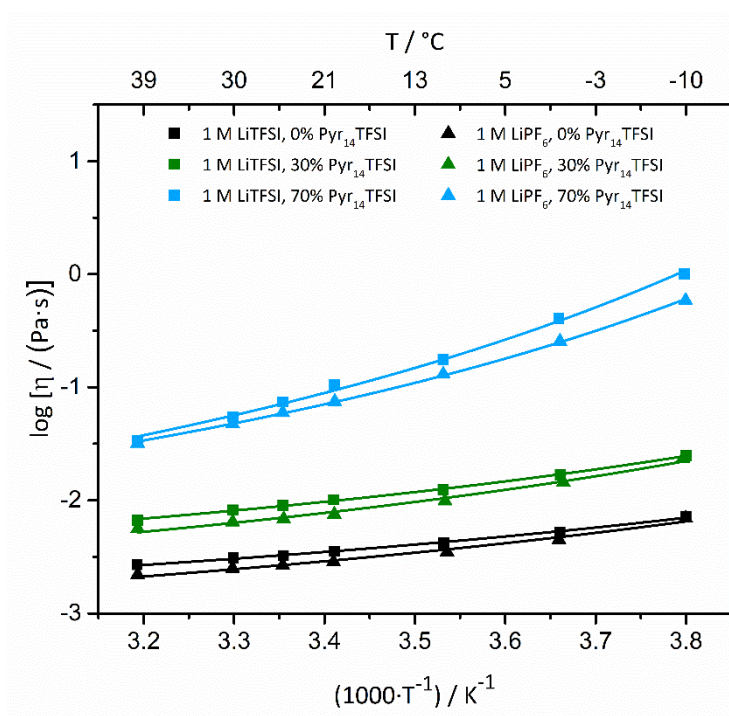

Figure S11. Arrhenius plot of viscosities of Pyr<sub>14</sub>TFSI/EC/DMC blends (0, 30 and 70% Pyr<sub>14</sub>TFSI) with 1 M LiTFSI and 1 M LiPF<sub>6</sub> as conducting salts measured from -10 to 40 °C. The data points are fitted using VTF functions.

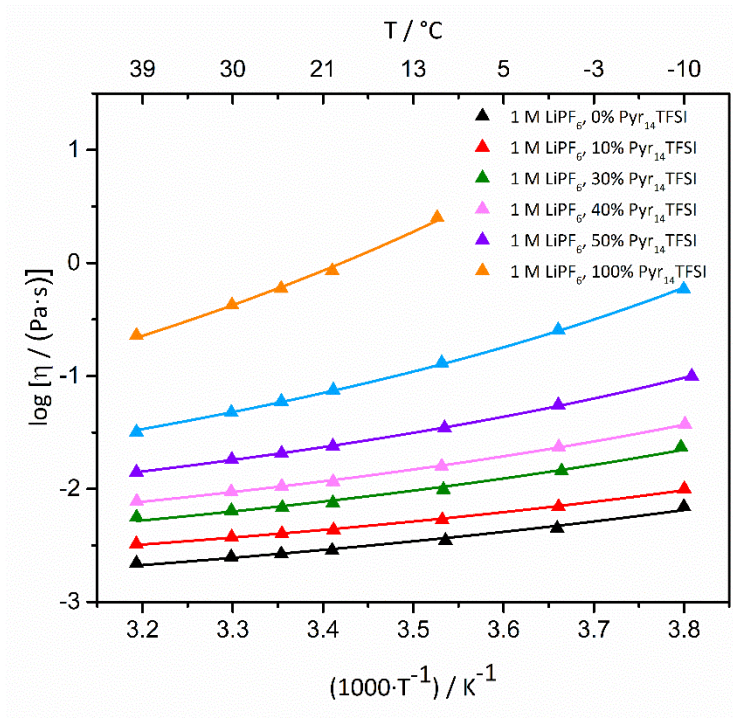

Figure S12. Arrhenius plot of viscosities of Pyr<sub>14</sub>TFSI/EC/DMC blends with 1 M LiPF<sub>6</sub> as conducting salt measured from -10 to 40 °C. The data points are fitted using VTF functions. The viscosities of solutions containing 100% Pyr<sub>14</sub>TFSI could not be measured at low temperatures due to partial solidification.

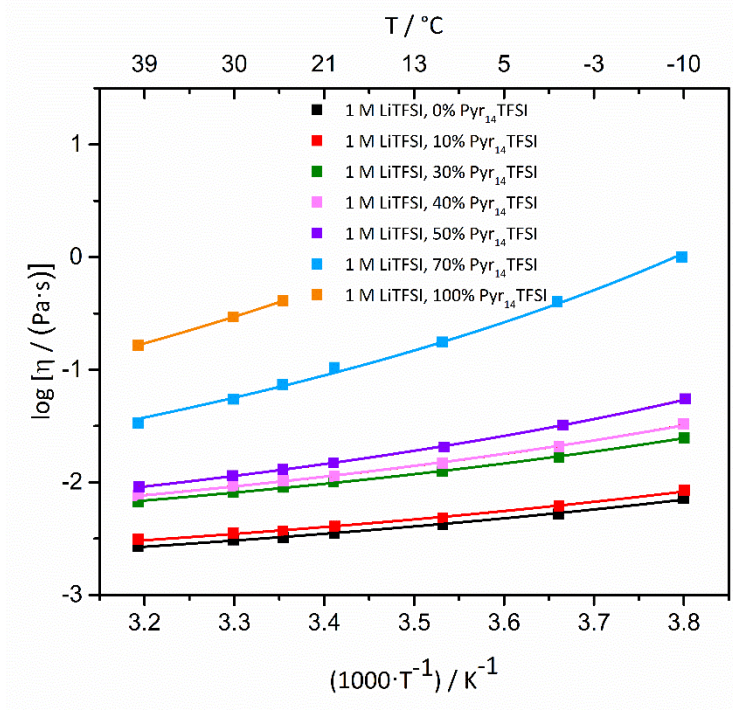

Figure S13. Arrhenius plot of viscosities of Pyr<sub>14</sub>TFSI/EC/DMC blends with 1 M LiTFSI as conducting salt measured from -10 to 40 °C. The data points are fitted using VTF functions. The viscosities of solutions containing 100% Pyr<sub>14</sub>TFSI could not be measured at low temperatures due to partial solidification.

## Degree of ion dissociation

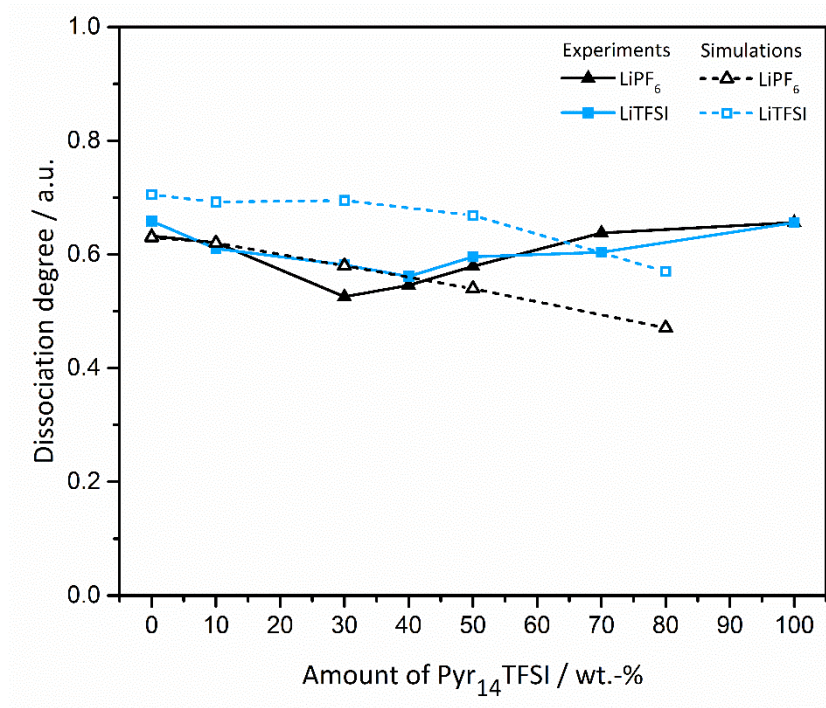

Figure S14. Dissociation degree of the conducting salts LiTFSI and LiPF<sub>6</sub> in blends of Pyr<sub>14</sub>TFSI, EC and DMC at 25 °C. ■▲ Experimental data points. □△ Simulation data points. The solid and dashed lines are guides to the eye.

## Thermal stability

### Experimental

#### Thermal gravimetric analysis (TGA)

Thermal gravimetric analysis (TGA) measurements were performed with a TGA Q5000 measuring device. The samples were prepared in sealed aluminum pans, which were tared before use. After an equilibration at 30 °C and an isothermal step for 10 minutes, the temperature was raised up to 575 °C with 10 °C per minute and the weights of the samples were measured. Nitrogen was used as balance and sample gas.

#### Differential scanning calorimetry (DSC)

Differential scanning calorimetry (DSC) measurements were performed with a DSC Q2000 measuring device. The samples were prepared in hermetic aluminum pans. After an equilibration at 40 °C and an isothermal step for two minutes, heat flow was measured three times from 40 °C to -150 °C to again 40 °C. Helium and nitrogen were both used as ambient gases with 25 ml/min.

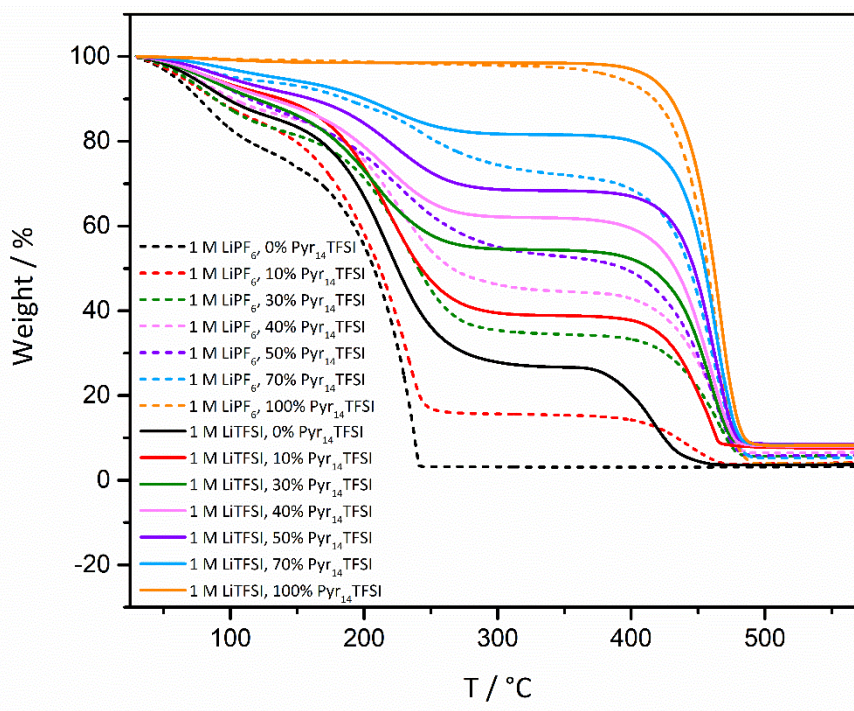

Figure S15. Weight loss in % of the investigated Pyr<sub>14</sub>TFSI/EC/DMC samples with increasing temperature (30 - 575 °C) resulting from TGA measurements.

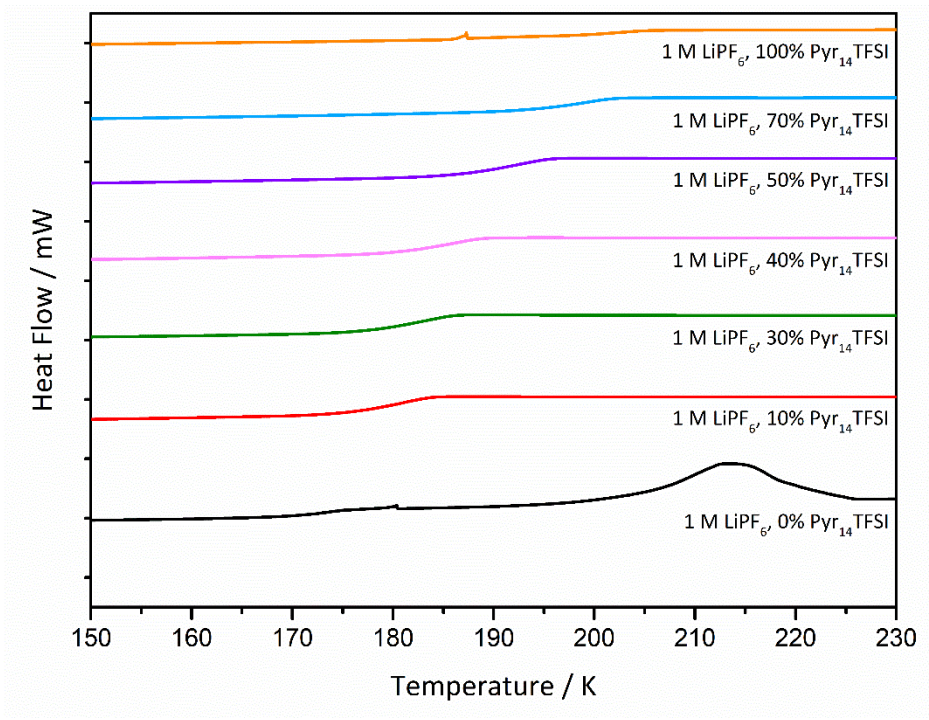

Figure S16. Heat flows in mW in the temperature range from 150 to 230 K for blends of 1 M LiPF<sub>6</sub> in Pyr<sub>14</sub>TFSI/EC/DMC resulting from DSC measurements.

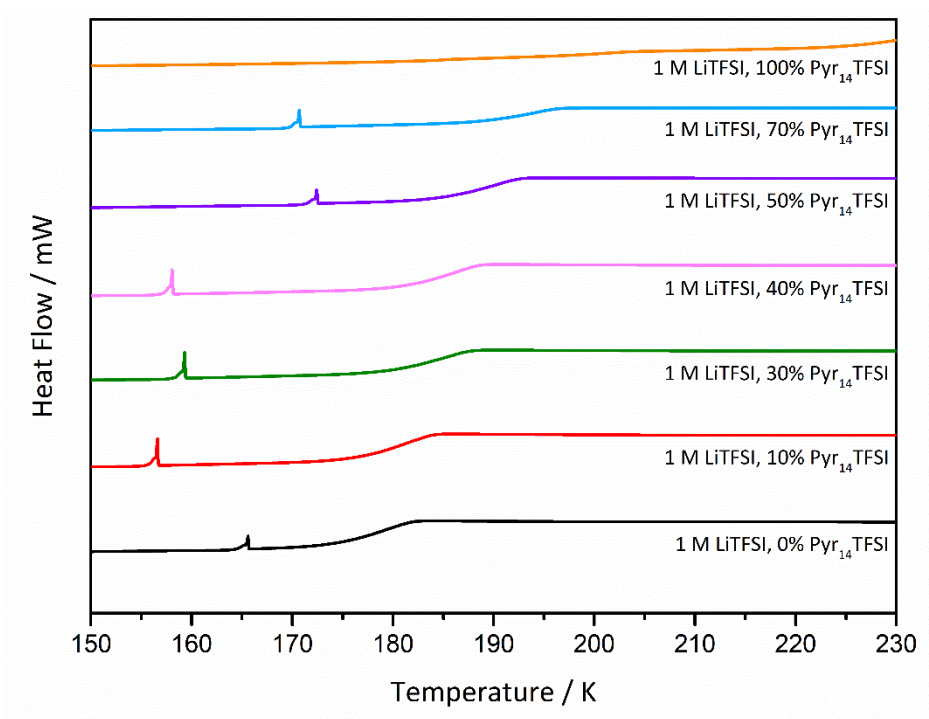

Figure S17. Heat flows in mW in the temperature range from 150 to 230 K for blends of 1 M LiTFSI in Pyr<sub>14</sub>TFSI/EC/DMC resulting from DSC measurements.

Table ST1. VTF activation energies derived from fitting viscosity and impedance data and glass transition temperatures of Pyr<sub>14</sub>TFSI/EC/DMC blends with 1 M LiPF<sub>6</sub> and 1 M LiTFSI as conducting salts.

|                             | Amount of Pyr <sub>14</sub> TFSI / wt-% | T <sub>g</sub> / K | B <sub>Visco</sub> / K | B <sub>Imp</sub> / K | B <sub>Visco</sub> ·R / kJ·mol <sup>-1</sup> | B <sub>Imp</sub> ·R / kJ·mol <sup>-1</sup> |
|-----------------------------|-----------------------------------------|--------------------|------------------------|----------------------|----------------------------------------------|--------------------------------------------|
| <b>1 M LiPF<sub>6</sub></b> | 0                                       | 175 ±4             | 120 ±9                 | 128 ±9               | 1.00 ±0.07                                   | 1.06 ±0.07                                 |
|                             | 10                                      | 182 ±4             | 103 ±8                 | 121 ±9               | 0.86 ±0.07                                   | 1.01 ±0.07                                 |
|                             | 30                                      | 185 ±4             | 127 ±11                | 135 ±11              | 1.06 ±0.09                                   | 1.12 ±0.09                                 |
|                             | 40                                      | 187 ±3             | 132 ±8                 | 139 ±8               | 1.10 ±0.07                                   | 1.16 ±0.07                                 |
|                             | 50                                      | 192 ±2             | 144 ±6                 | 139 ±6               | 1.20 ±0.05                                   | 1.16 ±0.05                                 |
|                             | 70                                      | 196 ±2             | 180 ±9                 | 164 ±7               | 1.50 ±0.07                                   | 1.36 ±0.06                                 |
|                             | 100                                     | 198 ±1             | 345 ±8                 | 263 ±6               | 2.87 ±0.10                                   | 2.19 ±0.08                                 |
| <b>1 M LiTFSI</b>           | 0                                       | 176 ±3             | 101 ±6                 | 110 ±7               | 0.84 ±0.06                                   | 0.91 ±0.07                                 |
|                             | 10                                      | 179 ±2             | 99 ±3                  | 112 ±5               | 0.82 ±0.04                                   | 0.93 ±0.05                                 |
|                             | 30                                      | 184 ±2             | 114 ±4                 | 133 ±5               | 0.95 ±0.04                                   | 1.11 ±0.04                                 |
|                             | 40                                      | 185 ±1             | 126 ±5                 | 136 ±5               | 1.05 ±0.05                                   | 1.13 ±0.06                                 |
|                             | 50                                      | 191 ±2             | 137 ±6                 | 137 ±6               | 1.14 ±0.06                                   | 1.14 ±0.06                                 |
|                             | 70                                      | 195 ±2             | 169 ±8                 | 158 ±7               | 1.41 ±0.08                                   | 1.31 ±0.07                                 |
|                             | 100                                     | 198 ±0             | 301 ±6                 | 231 ±5               | 2.50 ±0.08                                   | 1.92 ±0.06                                 |

## Electrochemical stability

### Experimental

#### Linear sweep voltammetry (LSV)

In order to determine the electrochemical stability window (ESW), linear sweep voltammetry (LSV) measurements were performed with a VMP3 (BioLogic Science Instruments) from 0 to 6 V with a scan rate of  $0.1 \text{ mV s}^{-1}$ . A three-electrode Swagelok cell was used with platinum ( $\varnothing 1 \text{ mm}$ ) as working electrode and lithium metal as counter ( $\varnothing 12 \text{ mm}$ ) and reference ( $\varnothing 5 \text{ mm}$ ) electrode. Freudenberg FS 2190 was used as separator. The measurements were performed at room temperature.

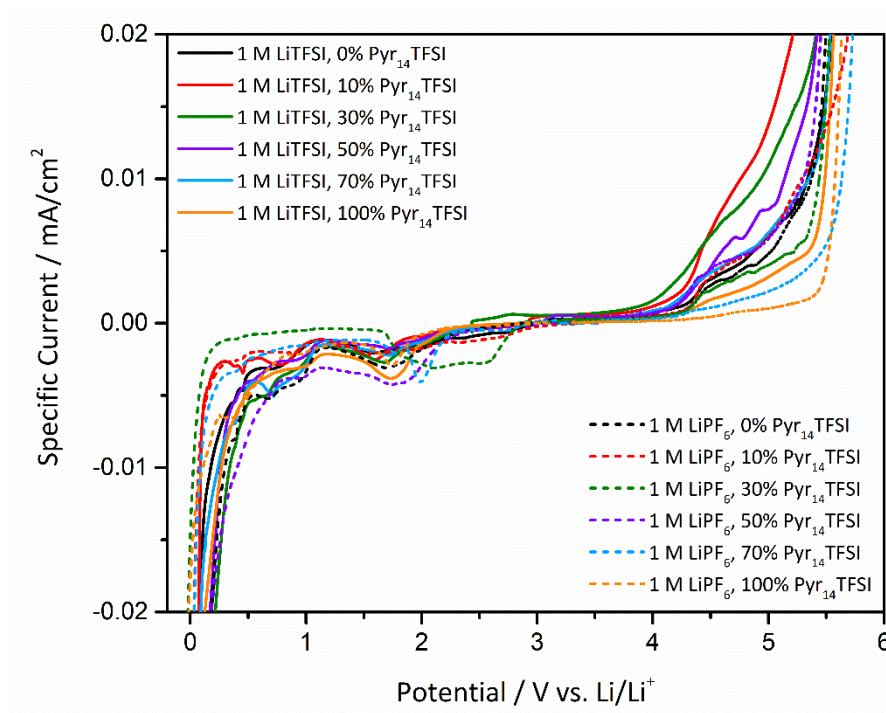

Figure 18. Linear sweep voltammetry profiles of the investigated Pyr<sub>14</sub>TFSI/EC/DMC blends with 1 M LiPF<sub>6</sub> and 1 M LiTFSI as conducting salts at room temperature with a scan rate of 0.1 mV/s.
